# Supplementary material for: Co-Circulation of Bovine Leukemia Virus Haplotypes among Humans, Animals, and Food Products: New Insights of Its Zoonotic Potential
Source: MDPI journal article supplement (doi:10.3390/ijerph18094883), 2021-05-04
Supplement: s1 [file s1]

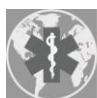

Research Article

# Co-circulation of Bovine Leukemia Virus haplotypes among humans, animals, and food products: new insights of its zoonotic potential

Adriana P. Corredor-Figueroa <sup>1,2,\*</sup>, Nury N. Olaya-Galán <sup>1,3,\*</sup>, Sebastian Velandia-Álvarez <sup>1</sup>, Marina Muñoz <sup>4</sup>, Sandra P. Salas-Cárdenas <sup>1</sup>, Milcíades Ibáñez-Pinilla <sup>5</sup>, Manuel A. Patarroyo <sup>6,7,8</sup>, Maria F. Gutiérrez <sup>1</sup>

## Supplementary material

**Table S1.** Accession numbers and details of the sequences included in the BLV analysis – *gag* region. Table includes reference and own sequences.

| Accession Number | Country   | Host       | Isolation Source | Hap. |
|------------------|-----------|------------|------------------|------|
| AB987702         | Japan     | Bos taurus | Lymph            | 4    |
| AF033818         | USA       | NA         | Clone            | 8    |
| AF257515         | Argentina | Bos taurus | Blood            | 31   |
| AP018006         | Japan     | Bos taurus | Blood            | 4    |
| AP018007         | Japan     | Bos taurus | Blood            | 1    |
| AP018008         | Japan     | Bos taurus | Blood            | 1    |
| AP018010         | Japan     | Bos taurus | Blood            | 4    |
| AP018011         | Japan     | Bos taurus | Blood            | 1    |
| AP018012         | Japan     | Bos taurus | Blood            | 1    |
| AP018013         | Japan     | Bos taurus | Blood            | 1    |
| AP018014         | Japan     | Bos taurus | Blood            | 4    |
| AP018015         | Japan     | Bos taurus | Blood            | 1    |
| AP018016         | Japan     | Bos taurus | Blood            | 1    |
| AP018017         | Japan     | Bos taurus | Blood            | 4    |
| AP018018         | Japan     | Bos taurus | Blood            | 1    |
| AP018019         | Japan     | Bos taurus | Blood            | 30   |
| AP018020         | Japan     | Bos taurus | Blood            | 29   |
| AP018021         | Japan     | Bos taurus | Blood            | 1    |
| AP018023         | Japan     | Bos taurus | Blood            | 1    |
| AP018024         | Japan     | Bos taurus | Blood            | 4    |
| AP018025         | Japan     | Bos taurus | Blood            | 4    |
| AP018026         | Japan     | Bos taurus | Blood            | 4    |
| AP018028         | Japan     | Bos taurus | Blood            | 4    |
| AP018029         | Japan     | Bos taurus | Blood            | 1    |

| Accession Number | Country   | Host         | Isolation Source | Hap. |
|------------------|-----------|--------------|------------------|------|
| AP018030         | Japan     | Bos taurus   | Blood            | 1    |
| AP018031         | Japan     | Bos taurus   | Blood            | 1    |
| AP018032         | Japan     | Bos taurus   | Blood            | 1    |
| EF600696         | FLK       | Ovis ovis    | Cell line        | 1    |
| FJ914764         | Argentina | Bos taurus   | Blood            | 26   |
| HE967302         | Uruguay   | Bos taurus   | Lymphosarcoma    | 1    |
| HE967303         | Uruguay   | Bos taurus   | Lymphosarcoma    | 1    |
| JQ480623.1       | Colombia  | Homo Sapiens | Breast           | 1    |
| JQ480624.1       | Colombia  | Homo Sapiens | Breast           | 1    |
| JQ480625.1       | Colombia  | Homo Sapiens | Breast           | 1    |
| JQ480626.1       | Colombia  | Homo Sapiens | Breast           | 1    |
| JQ480627.1       | Colombia  | Homo Sapiens | Breast           | 1    |
| JQ480628.1       | Colombia  | Homo Sapiens | Breast           | 1    |
| JQ480629.1       | Colombia  | Homo Sapiens | Breast           | 1    |
| JQ480630.1       | Colombia  | Homo Sapiens | Breast           | 1    |
| JQ480631.1       | Colombia  | Homo Sapiens | Breast           | 1    |
| JQ480632.1       | Colombia  | Homo Sapiens | Breast           | 1    |
| JQ480633.1       | Colombia  | Homo Sapiens | Breast           | 1    |
| JQ480634.1       | Colombia  | Homo Sapiens | Breast           | 1    |
| JQ480635.1       | Colombia  | Homo Sapiens | Breast           | 1    |
| JQ480636.1       | Colombia  | Homo Sapiens | Breast           | 1    |
| JQ480637.1       | Colombia  | Homo Sapiens | Breast           | 1    |
| JQ480638.1       | Colombia  | Homo Sapiens | Breast           | 1    |
| JQ480639.1       | Colombia  | Homo Sapiens | Breast           | 1    |
| JQ480640.1       | Colombia  | Homo Sapiens | Breast           | 1    |
| JQ480641.1       | Colombia  | Homo Sapiens | Breast           | 1    |
| JQ480642.1       | Colombia  | Homo Sapiens | Breast           | 1    |
| JQ480643.1       | Colombia  | Homo Sapiens | Breast           | 1    |
| JQ480644.1       | Colombia  | Homo Sapiens | Breast           | 1    |
| JQ480645.1       | Colombia  | Homo Sapiens | Breast           | 1    |
| JQ480646.1       | Colombia  | Homo Sapiens | Breast           | 1    |

| Accession Number | Country  | Host          | Isolation Source | Hap. |
|------------------|----------|---------------|------------------|------|
| JQ480647.1       | Colombia | Homo Sapiens  | Breast           | 1    |
| JQ480648.1       | Colombia | Homo Sapiens  | Breast           | 1    |
| JQ480649.1       | Colombia | Homo Sapiens  | Breast           | 1    |
| LC005615         | Japan    | Bos taurus    | Lymphosarcoma    | 28   |
| LC005616         | Japan    | Bos taurus    | Lymphosarcoma    | 28   |
| LC080651         | Paraguay | Bos taurus    | Blood            | 1    |
| LC080652         | Paraguay | Bos taurus    | Blood            | 1    |
| LC080653         | Paraguay | Bos taurus    | Blood            | 1    |
| LC080654         | Peru     | Bos taurus    | Blood            | 27   |
| LC080655         | Paraguay | Bos taurus    | Blood            | 26   |
| LC080656         | Paraguay | Bos taurus    | Blood            | 25   |
| LC080657         | Paraguay | Bos taurus    | Blood            | 17   |
| LC080658         | Paraguay | Bos taurus    | Blood            | 24   |
| LC080659         | Bolivia  | Bos taurus    | Blood            | 22   |
| LC080660         | Bolivia  | Bos taurus    | Blood            | 23   |
| LC080661         | Bolivia  | Bos taurus    | Blood            | 22   |
| LC080662         | Bolivia  | Bos taurus    | Blood            | 22   |
| LC080663         | Bolivia  | Bos taurus    | Blood            | 22   |
| LC080664         | Bolivia  | Bos taurus    | Blood            | 19   |
| LC080665         | Bolivia  | Bos taurus    | Blood            | 21   |
| LC080666         | Bolivia  | Bos taurus    | Blood            | 19   |
| LC080667         | Bolivia  | Bos taurus    | Blood            | 19   |
| LC080668         | Bolivia  | Bos taurus    | Blood            | 19   |
| LC080669         | Bolivia  | Bos taurus    | Blood            | 20   |
| LC080670         | Bolivia  | Bos taurus    | Blood            | 19   |
| LC080671         | Bolivia  | Bos taurus    | Blood            | 19   |
| LC080672         | Bolivia  | Bos taurus    | Blood            | 19   |
| LC080673         | Bolivia  | Bos taurus    | Blood            | 19   |
| LC080674         | Bolivia  | Bos taurus    | Blood            | 19   |
| LC080675         | Bolivia  | Bos taurus    | Blood            | 19   |
| LC154848         | Myanmar  | Bos taurus    | Blood            | 18   |
| LC154849         | Myanmar  | Bos taurus    | Blood            | 16   |
| LC164083         | pBLV-FLK | Ovis ovis     | Blood            | 1    |
| LC164085         | Japan    | Bos taurus    | Blood            | 4    |
| LC164086         | Japan    | Bos taurus    | Blood            | 4    |
| MF580991         | China    | Bos grunniens | Blood            | 17   |
| MF580992         | China    | Bos grunniens | Blood            | 17   |
| MF580995         | China    | Bos grunniens | Blood            | 16   |
| MG800834         | China    | Bos taurus    | Blood            | 4    |

| Accession Number | Country  | Host       | Isolation Source | Hap. |
|------------------|----------|------------|------------------|------|
| MH057402.1       | Colombia | Bos taurus | Blood            | 11   |
| MH057403.1       | Colombia | Bos taurus | Blood            | 1    |
| MH057404.1       | Colombia | Bos taurus | Blood            | 1    |
| MH057405.1       | Colombia | Bos taurus | Blood            | 4    |
| MH057406.1       | Colombia | Bos taurus | Blood            | 1    |
| MH057407.1       | Colombia | Bos taurus | Blood            | 4    |
| MH057408.1       | Colombia | Bos taurus | Blood            | 4    |
| MH057409.1       | Colombia | Bos taurus | Blood            | 4    |
| MH057410.1       | Colombia | Bos taurus | Blood            | 4    |
| MH057411.1       | Colombia | Bos taurus | Blood            | 4    |
| MH057412.1       | Colombia | Bos taurus | Blood            | 4    |
| MH057413.1       | Colombia | Bos taurus | Blood            | 1    |
| MH057414.1       | Colombia | Bos taurus | Blood            | 15   |
| MH057415.1       | Colombia | Bos taurus | Blood            | 12   |
| MH057416.1       | Colombia | Bos taurus | Blood            | 4    |
| MH057417.1       | Colombia | Bos taurus | Blood            | 1    |
| MH057418.1       | Colombia | Bos taurus | Blood            | 4    |
| MH057419.1       | Colombia | Bos taurus | Blood            | 4    |
| MH057420.1       | Colombia | Bos taurus | Blood            | 14   |
| MH057421.1       | Colombia | Bos taurus | Blood            | 4    |
| MH057422.1       | Colombia | Bos taurus | Blood            | 4    |
| MH057423.1       | Colombia | Bos taurus | Blood            | 2    |
| MH057424.1       | Colombia | Bos taurus | Blood            | 1    |
| MH057425.1       | Colombia | Bos taurus | Blood            | 1    |
| MH057426.1       | Colombia | Bos taurus | Blood            | 1    |
| MH057427.1       | Colombia | Bos taurus | Blood            | 1    |
| MH057428.1       | Colombia | Bos taurus | Blood            | 3    |
| MH057429.1       | Colombia | Bos taurus | Blood            | 1    |
| MH057430.1       | Colombia | Bos taurus | Blood            | 4    |
| MH057431.1       | Colombia | Bos taurus | Blood            | 11   |
| MH057432.1       | Colombia | Bos taurus | Blood            | 1    |
| MH057433.1       | Colombia | Bos taurus | Blood            | 11   |
| MH057434.1       | Colombia | Bos taurus | Blood            | 11   |
| MH057435.1       | Colombia | Bos taurus | Blood            | 1    |
| MH057436.1       | Colombia | Bos taurus | Blood            | 1    |
| MH057437.1       | Colombia | Bos taurus | Blood            | 13   |
| MH057438.1       | Colombia | Bos taurus | Blood            | 4    |
| MH057439.1       | Colombia | Bos taurus | Blood            | 4    |
| MH057440.1       | Colombia | Bos taurus | Blood            | 12   |
| MH057441.1       | Colombia | Bos taurus | Blood            | 1    |
| MH057442.1       | Colombia | Bos taurus | Blood            | 1    |
| MH057443.1       | Colombia | Bos taurus | Blood            | 1    |

| Accession Number | Country  | Host         | Isolation Source | Hap. |
|------------------|----------|--------------|------------------|------|
| MH057444.1       | Colombia | Bos taurus   | Blood            | 11   |
| MH057445.1       | Colombia | Bos taurus   | Blood            | 1    |
| MH057446.1       | Colombia | Bos taurus   | Blood            | 1    |
| MH057447.1       | Colombia | Bos taurus   | Blood            | 1    |
| MH057448.1       | Colombia | Bos taurus   | Blood            | 1    |
| MH057449.1       | Colombia | Bos taurus   | Blood            | 1    |
| MH057450.1       | Colombia | Bos taurus   | Blood            | 1    |
| MH057451.1       | Colombia | Bos taurus   | Blood            | 1    |
| MH057452.1       | Colombia | Bos taurus   | Blood            | 1    |
| MH057453.1       | Colombia | Bos taurus   | Blood            | 1    |
| MH057454.1       | Colombia | Bos taurus   | Blood            | 1    |
| MH057455.1       | Colombia | Bos taurus   | Blood            | 4    |
| MH057456.1       | Colombia | Bos taurus   | Blood            | 1    |
| MH057457.1       | Colombia | Bos taurus   | Blood            | 1    |
| MH057458.1       | Colombia | Bos taurus   | Blood            | 1    |
| MH057459.1       | Colombia | Bos taurus   | Blood            | 1    |
| MH057460.1       | Colombia | Bos taurus   | Blood            | 1    |
| MH057461.1       | Colombia | Bos taurus   | Blood            | 1    |
| MH057462.1       | Colombia | Bos taurus   | Blood            | 1    |
| MH057463.1       | Colombia | Bos taurus   | Blood            | 1    |
| MH057464.1       | Colombia | Bos taurus   | Blood            | 4    |
| MH057465.1       | Colombia | Bos taurus   | Blood            | 1    |
| MH170027         | Vietnam  | Bos taurus   | Blood            | 4    |
| MH170028         | Vietnam  | Bos taurus   | Blood            | 4    |
| MH170029         | Vietnam  | Bos taurus   | Blood            | 10   |
| MH170030         | Vietnam  | Bos taurus   | Blood            | 9    |
| MH293473.1       | Colombia | Food product | Beef             | 1    |
| MH293474.1       | Colombia | Food product | Beef             | 4    |
| MH293475.1       | Colombia | Food product | Beef             | 1    |
| MH293476.1       | Colombia | Food product | Beef             | 1    |
| MH293477.1       | Colombia | Food product | Beef             | 4    |
| MH293478.1       | Colombia | Food product | Beef             | 5    |
| MH293479.1       | Colombia | Food product | Beef             | 4    |
| MH293480.1       | Colombia | Food product | Beef             | 5    |
| MH293481.1       | Colombia | Food product | Beef             | 1    |
| MH293482.1       | Colombia | Food product | Beef             | 1    |
| MH293483.1       | Colombia | Food product | Beef             | 1    |
| MH293484.1       | Colombia | Food product | Beef             | 1    |
| MH293485.1       | Colombia | Food product | Beef             | 4    |
| MH293486.1       | Colombia | Food product | Beef             | 4    |
| MH293487.1       | Colombia | Food product | Milk             | 1    |
| MH293488.1       | Colombia | Food product | Milk             | 1    |

| Accession Number | Country  | Host         | Isolation Source | Hap. |
|------------------|----------|--------------|------------------|------|
| MH293489.1       | Colombia | Food product | Milk             | 4    |
| MH293490.1       | Colombia | Food product | Milk             | 1    |
| MH293491.1       | Colombia | Food product | Milk             | 1    |
| MH293492.1       | Colombia | Food product | Milk             | 4    |
| MH293493.1       | Colombia | Food product | Milk             | 4    |
| MH293494.1       | Colombia | Food product | Milk             | 4    |
| MH293495.1       | Colombia | Food product | Milk             | 4    |
| MH293496.1       | Colombia | Food product | Milk             | 4    |
| MH293497.1       | Colombia | Food product | Milk             | 4    |
| MH293498.1       | Colombia | Food product | Milk             | 4    |
| MH293499.1       | Colombia | Food product | Milk             | 1    |
| MH293500.1       | Colombia | Food product | Milk             | 4    |
| MH293501.1       | Colombia | Food product | Milk             | 4    |
| NC_001414        | RefSeq   | NA           | Clone            | 8    |
| MN831962.1       | Colombia | Homo Sapiens | Breast           | 4    |
| MN831961.1       | Colombia | Homo Sapiens | Breast           | 1    |
| MN831960.1       | Colombia | Homo Sapiens | Breast           | 1    |
| MN831959.1       | Colombia | Homo Sapiens | Breast           | 1    |
| MN831958.1       | Colombia | Homo Sapiens | Breast           | 3    |
| MN831957.1       | Colombia | Homo Sapiens | Breast           | 4    |
| MN831956.1       | Colombia | Homo Sapiens | Breast           | 1    |
| MN831955.1       | Colombia | Homo Sapiens | Breast           | 2    |
| MN831954.1       | Colombia | Homo Sapiens | Breast           | 4    |
| MN831953.1       | Colombia | Homo sapiens | Blood            | 4    |
| MN831952.1       | Colombia | Homo Sapiens | Breast           | 2    |
| MN831951.1       | Colombia | Homo Sapiens | Breast           | 4    |
| MN831950.1       | Colombia | Homo Sapiens | Breast           | 4    |
| MN831949.1       | Colombia | Homo Sapiens | Breast           | 4    |
| MN831948.1       | Colombia | Homo Sapiens | Breast           | 1    |
| MN831947.1       | Colombia | Homo sapiens | Blood            | 7    |
| MN831946.1       | Colombia | Homo sapiens | Blood            | 2    |
| MN831945.1       | Colombia | Homo Sapiens | Breast           | 2    |
| MN831944.1       | Colombia | Homo sapiens | Blood            | 2    |
| MN831943.1       | Colombia | Homo Sapiens | Breast           | 2    |
| MN831942.1       | Colombia | Homo sapiens | Blood            | 2    |

| Accession Number | Country  | Host         | Isolation Source | Hap. |
|------------------|----------|--------------|------------------|------|
| MN831941.1       | Colombia | Homo Sapiens | Breast           | 1    |
| MN831940.1       | Colombia | Homo Sapiens | Breast           | 6    |
| MN831939.1       | Colombia | Homo Sapiens | Breast           | 4    |
| MN831938.1       | Colombia | Homo Sapiens | Breast           | 1    |
| MN831937.1       | Colombia | Homo Sapiens | Breast           | 3    |
| MN831936.1       | Colombia | Homo Sapiens | Breast           | 4    |
| MN831935.1       | Colombia | Homo Sapiens | Blood            | 2    |
| MN831934.1       | Colombia | Homo Sapiens | Breast           | 1    |
| MN831933.1       | Colombia | Homo Sapiens | Breast           | 2    |
| MN831932.1       | Colombia | Homo Sapiens | Breast           | 5    |
| MN831931.1       | Colombia | Homo Sapiens | Breast           | 1    |
| MN831930.1       | Colombia | Homo sapiens | Blood            | 5    |
| MN831929.1       | Colombia | Homo Sapiens | Breast           | 2    |
| MN831928.1       | Colombia | Homo Sapiens | Breast           | 5    |
| MN831927.1       | Colombia | Homo Sapiens | Breast           | 4    |
| MN831926.1       | Colombia | Homo Sapiens | Breast           | 1    |
| MN831925.1       | Colombia | Homo Sapiens | Breast           | 1    |
| MN831924.1       | Colombia | Homo Sapiens | Blood            | 4    |
| MN831923.1       | Colombia | Homo Sapiens | Breast           | 4    |
| MN831922.1       | Colombia | Homo Sapiens | Blood            | 1    |
| MN831921.1       | Colombia | Homo Sapiens | Breast           | 1    |
| MN831920.1       | Colombia | Homo Sapiens | Breast           | 4    |
| MN831919.1       | Colombia | Homo Sapiens | Breast           | 4    |
| MN831918.1       | Colombia | Homo Sapiens | Blood            | 2    |
| MN831917.1       | Colombia | Homo Sapiens | Breast           | 2    |
| MN831916.1       | Colombia | Homo Sapiens | Breast           | 2    |
| MN831915.1       | Colombia | Homo Sapiens | Breast           | 4    |
| MN831914.1       | Colombia | Homo Sapiens | Blood            | 2    |
| MN831913.1       | Colombia | Homo Sapiens | Breast           | 4    |

| Accession Number | Country  | Host         | Isolation Source | Hap. |
|------------------|----------|--------------|------------------|------|
| MN831912.1       | Colombia | Homo Sapiens | Breast           | 4    |
| MN831911.1       | Colombia | Homo Sapiens | Breast           | 4    |
| MN831910.1       | Colombia | Homo Sapiens | Breast           | 1    |
| MN831909.1       | Colombia | Homo Sapiens | Breast           | 1    |
| MN831908.1       | Colombia | Homo Sapiens | Blood            | 4    |
| MN831907.1       | Colombia | Homo Sapiens | Blood            | 4    |
| MN831906.1       | Colombia | Homo Sapiens | Blood            | 1    |
| MN831905.1       | Colombia | Homo Sapiens | Breast           | 2    |
| MN831904.1       | Colombia | Homo Sapiens | Breast           | 1    |
| MN831903.1       | Colombia | Homo sapiens | Blood            | 1    |
| MN831902.1       | Colombia | Homo Sapiens | Breast           | 1    |
| MN831901.1       | Colombia | Homo Sapiens | Breast           | 3    |
| MN831900.1       | Colombia | Homo Sapiens | Breast           | 2    |
| MN831899.1       | Colombia | Homo sapiens | Blood            | 1    |
| MN831898.1       | Colombia | Homo Sapiens | Breast           | 2    |
| MN831897.1       | Colombia | Homo sapiens | Blood            | 1    |
| MN831896.1       | Colombia | Homo sapiens | Blood            | 1    |

**Table S2.** Sequences obtained in the current study from female samples collected from breast and blood. Population description.

| Accession  | Code                  | Population         | Participant | Age | Type of sample | Isolation Source | Hap. |
|------------|-----------------------|--------------------|-------------|-----|----------------|------------------|------|
| MN831896.1 | PUJ_COL_GAG<br>_91HMS | Mederi<br>Hospital | Patient     | 51  | Benign         | Blood            | 1    |
| MN831897.1 | PUJ_COL_GAG<br>_89HMS | Mederi<br>Hospital | Patient     | 68  | Malignant      | Blood            | 1    |
| MN831898.1 | PUJ_COL_GAG<br>_88HMT | Mederi<br>Hospital | Patient     | 70  | Malignant      | Breast           | 2    |
| MN831899.1 | PUJ_COL_GAG<br>_86HMS | Mederi<br>Hospital | Patient     | 45  | Benign         | Blood            | 1    |
| MN831900.1 | PUJ_COL_GAG<br>_85HMT | Mederi<br>Hospital | Patient     | 20  | Benign         | Breast           | 2    |
| MN831901.1 | PUJ_COL_GAG<br>_82HMT | Mederi<br>Hospital | Patient     | 68  | Malignant      | Breast           | 3    |
| MN831902.1 | PUJ_COL_GAG<br>_79ML  | INML               | Deceased    | 70  | No tumor       | Breast           | 1    |
| MN831903.1 | PUJ_COL_GAG<br>_76HMS | Mederi<br>Hospital | Patient     | 75  | Malignant      | Blood            | 1    |



| Accession  | Code                   | Population         | Participant | Age | Type of sample | Isolation Source | Hap. |
|------------|------------------------|--------------------|-------------|-----|----------------|------------------|------|
| MN831904.1 | PUJ_COL_GAG<br>_73ML   | INML               | Deceased    | 58  | No tumor       | Breast           | 1    |
| MN831905.1 | PUJ_COL_GAG<br>_73HMT  | Mederi<br>Hospital | Patient     | 65  | Malignant      | Breast           | 2    |
| MN831906.1 | PUJ_COL_GAG<br>_73HMS  | Mederi<br>Hospital | Patient     | 65  | Malignant      | Blood            | 1    |
| MN831907.1 | PUJ_COL_GAG<br>_71HMS  | Mederi<br>Hospital | Patient     | 62  | Benign         | Blood            | 4    |
| MN831908.1 | PUJ_COL_GAG<br>_70HMS  | Mederi<br>Hospital | Patient     | 70  | Malignant      | Blood            | 4    |
| MN831909.1 | PUJ_COL_GAG<br>_69ML   | INML               | Deceased    | 20  | No tumor       | Breast           | 1    |
| MN831910.1 | PUJ_COL_GAG<br>_68ML   | INML               | Deceased    | 33  | No tumor       | Breast           | 1    |
| MN831911.1 | PUJ_COL_GAG<br>_67ML   | INML               | Deceased    | 78  | No tumor       | Breast           | 4    |
| MN831912.1 | PUJ_COL_GAG<br>_67HMT  | Mederi<br>Hospital | Patient     | 71  | Benign         | Breast           | 4    |
| MN831913.1 | PUJ_COL_GAG<br>_66HMT  | Mederi<br>Hospital | Patient     | 71  | Malignant      | Breast           | 4    |
| MN831914.1 | PUJ_COL_GAG<br>_54HMS  | Mederi<br>Hospital | Patient     | 79  | Benign         | Blood            | 2    |
| MN831915.1 | PUJ_COL_GAG<br>_46HMT  | Mederi<br>Hospital | Patient     | 21  | Benign         | Breast           | 4    |
| MN831916.1 | PUJ_COL_GAG<br>_42HMT  | Mederi<br>Hospital | Patient     | 55  | Malignant      | Breast           | 2    |
| MN831917.1 | PUJ_COL_GAG<br>_39HMT  | Mederi<br>Hospital | Patient     | 73  | Malignant      | Breast           | 2    |
| MN831918.1 | PUJ_COL_GAG<br>_39HMS  | Mederi<br>Hospital | Patient     | 73  | Malignant      | Blood            | 2    |
| MN831919.1 | PUJ_COL_GAG<br>_39HMT  | Mederi<br>Hospital | Patient     | 73  | Benign         | Breast           | 4    |
| MN831920.1 | PUJ_COL_GAG<br>_33HMT  | Mederi<br>Hospital | Patient     | 47  | Malignant      | Breast           | 4    |
| MN831921.1 | PUJ_COL_GAG<br>_27HMT  | Mederi<br>Hospital | Patient     | 69  | Malignant      | Breast           | 1    |
| MN831922.1 | PUJ_COL_GAG<br>_27HMS  | Mederi<br>Hospital | Patient     | 69  | Malignant      | Blood            | 1    |
| MN831923.1 | PUJ_COL_GAG<br>_19HMT  | Mederi<br>Hospital | Patient     | 24  | Benign         | Breast           | 4    |
| MN831924.1 | PUJ_COL_GAG<br>_19HMS  | Mederi<br>Hospital | Patient     | 24  | Benign         | Blood            | 4    |
| MN831925.1 | PUJ_COL_GAG<br>_18ML   | INML               | Deceased    | 25  | No tumor       | Breast           | 1    |
| MN831926.1 | PUJ_COL_GAG<br>_15ML   | INML               | Deceased    | 52  | No tumor       | Breast           | 1    |
| MN831927.1 | PUJ_COL_GAG<br>_158HMT | Mederi<br>Hospital | Patient     | 75  | Malignant      | Breast           | 4    |
| MN831928.1 | PUJ_COL_GAG<br>_151HMT | Mederi<br>Hospital | Patient     | 69  | Malignant      | Breast           | 5    |
| MN831929.1 | PUJ_COL_GAG<br>_150HMT | Mederi<br>Hospital | Patient     | 80  | Malignant      | Breast           | 2    |

| Accession  | Code                   | Population         | Participant | Age | Type of sample | Isolation Source | Hap. |
|------------|------------------------|--------------------|-------------|-----|----------------|------------------|------|
| MN831930.1 | PUJ_COL_GAG<br>_150HMS | Mederi<br>Hospital | Patient     | 80  | Malignant      | Blood            | 5    |
| MN831931.1 | PUJ_COL_GAG<br>_14ML   | INML               | Deceased    | 41  | No tumor       | Breast           | 1    |
| MN831932.1 | PUJ_COL_GAG<br>_149HMT | Mederi<br>Hospital | Patient     | 79  | Malignant      | Breast           | 5    |
| MN831933.1 | PUJ_COL_GAG<br>_144HMT | Mederi<br>Hospital | Patient     | 51  | Malignant      | Breast           | 2    |
| MN831934.1 | PUJ_COL_GAG<br>_138ML  | INML               | Deceased    | 40  | No tumor       | Breast           | 1    |
| MN831935.1 | PUJ_COL_GAG<br>_133HMS | Mederi<br>Hospital | Patient     | 23  | Benign         | Blood            | 2    |
| MN831936.1 | PUJ_COL_GAG<br>_130HMT | Mederi<br>Hospital | Patient     | 58  | Benign         | Breast           | 4    |
| MN831937.1 | PUJ_COL_GAG<br>_12HMT  | Mederi<br>Hospital | Patient     | 34  | Benign         | Breast           | 3    |
| MN831938.1 | PUJ_COL_GAG<br>_129ML  | INML               | Deceased    | 40  | No tumor       | Breast           | 1    |
| MN831939.1 | PUJ_COL_GAG<br>_126ML  | INML               | Deceased    | 89  | No tumor       | Breast           | 4    |
| MN831940.1 | PUJ_COL_GAG<br>_120HMT | Mederi<br>Hospital | Patient     | 66  | Malignant      | Breast           | 6    |
| MN831941.1 | PUJ_COL_GAG<br>_11ML   | INML               | Deceased    | 50  | No tumor       | Breast           | 1    |
| MN831942.1 | PUJ_COL_GAG<br>_119HMS | Mederi<br>Hospital | Patient     | 50  | Malignant      | Blood            | 2    |
| MN831943.1 | PUJ_COL_GAG<br>_118HMT | Mederi<br>Hospital | Patient     | 62  | Malignant      | Breast           | 2    |
| MN831944.1 | PUJ_COL_GAG<br>_118HMS | Mederi<br>Hospital | Patient     | 62  | Malignant      | Blood            | 2    |
| MN831945.1 | PUJ_COL_GAG<br>_117HMT | Mederi<br>Hospital | Patient     | 25  | Benign         | Breast           | 2    |
| MN831946.1 | PUJ_COL_GAG<br>_116HMS | Mederi<br>Hospital | Patient     | 63  | Benign         | Blood            | 2    |
| MN831947.1 | PUJ_COL_GAG<br>_115HMS | Mederi<br>Hospital | Patient     | 50  | Benign         | Blood            | 7    |
| MN831948.1 | PUJ_COL_GAG<br>_113ML  | INML               | Deceased    | 76  | No tumor       | Breast           | 1    |
| MN831949.1 | PUJ_COL_GAG<br>_110ML  | INML               | Deceased    | 51  | No tumor       | Tissue           | 4    |
| MN831950.1 | PUJ_COL_GAG<br>_110HMT | Mederi<br>Hospital | Patient     | 29  | Benign         | Breast           | 4    |
| MN831951.1 | PUJ_COL_GAG<br>_109HMT | Mederi<br>Hospital | Patient     | 27  | Benign         | Breast           | 4    |
| MN831952.1 | PUJ_COL_GAG<br>_107HMT | Mederi<br>Hospital | Patient     | 52  | Pre-malignant  | Breast           | 2    |
| MN831953.1 | PUJ_COL_GAG<br>_107HMS | Mederi<br>Hospital | Patient     | 52  | Pre-malignant  | Blood            | 4    |
| MN831954.1 | PUJ_COL_GAG<br>_106HMT | Mederi<br>Hospital | Patient     | 46  | Malignant      | Breast           | 4    |
| MN831955.1 | PUJ_COL_GAG<br>_104HMT | Mederi<br>Hospital | Patient     | 70  | Malignant      | Breast           | 2    |

| Accession  | Code              | Population      | Participant | Age | Type of sample | Isolation Source | Hap. |
|------------|-------------------|-----------------|-------------|-----|----------------|------------------|------|
| MN831956.1 | PUJ_COL_GAG_09ML  | INML            | Deceased    | 63  | No tumor       | Breast           | 1    |
| MN831957.1 | PUJ_COL_GAG_09HMT | Mederi Hospital | Patient     | 24  | Pre-malignant  | Breast           | 4    |
| MN831958.1 | PUJ_COL_GAG_08HMT | Mederi Hospital | Patient     | 63  | Benign         | Breast           | 3    |
| MN831959.1 | PUJ_COL_GAG_07ML  | INML            | Deceased    | ND  | No tumor       | Breast           | 1    |
| MN831960.1 | PUJ_COL_GAG_06ML  | INML            | Deceased    | ND  | No tumor       | Breast           | 1    |
| MN831961.1 | PUJ_COL_GAG_05ML  | INML            | Deceased    | 65  | No tumor       | Breast           | 1    |
| MN831962.1 | PUJ_COL_GAG_02ML  | INML            | Deceased    | 57  | No tumor       | Breast           | 4    |

\*INML – Instituto Nacional de Medicina Legal.

#### Sequences distribution:

*Participants:* Patients (n=48), Deceased (n=19)

*Type of sample:* Malignant (n=26), Pre-malignant (n=3), Benign (n=19), No tumor (n=19)

**Table S3.** Haplotypes distribution among humans positive to BLV regarding their exposure factors for viral acquisition. Chi-square bivariate analysis of exposure factors vs haplotypes.

| BLV EXPOSURE FACTORS*                           | HAPLOTYPES PRESENT IN HUMANS |            |            |            |            |            |            | P value |
|-------------------------------------------------|------------------------------|------------|------------|------------|------------|------------|------------|---------|
|                                                 | 1<br>n (%)                   | 2<br>n (%) | 3<br>n (%) | 4<br>n (%) | 5<br>n (%) | 6<br>n (%) | 7<br>n (%) |         |
| <i>Dairy products and raw milk consumption</i>  | 14 (26.42)                   | 13 (24.53) | 3 (5.66)   | 17 (32.08) | 2 (3.77)   | 1 (1.89)   | 1 (1.89)   | 0.965   |
| <i>Beef consumption</i>                         | 14 (26.42)                   | 13 (24.53) | 3 (5.66)   | 18 (33.96) | 2 (3.77)   | 1 (1.89)   | 1 (1.89)   | 0.829   |
| <i>Contact with cattle</i>                      | 4 (9.30)                     | 4 (9.30)   | 2 (4.65)   | 6 (13.95)  | 1 (2.33)   | 0          | 0          | 0.75    |
| <i>Contact with blood</i>                       | 1 (2.44)                     | 3 (7.32)   | 0          | 2 (4.88)   | 2 (4.88)   | 0          | 0          | 0.135   |
| <i>Living in shared environment with cattle</i> | 4 (7.55)                     | 3 (5.66)   | 0          | 7 (13.21)  | 2 (3.77)   | 0          | 0          | 0.241   |

\* BLV sequences from humans (n=67). Not all the participants answered the survey of exposure factors. Missing data (n=14).
